# Supplementary material for: The Chloroplast Genome Comparative Characteristic of Artificial Breeding Tree, a Case About Broussonetia Kazinoki × Broussonetia Papyifera
Source: Research Square preprint supplement (doi:10.21203/rs.3.rs-87181/v1), 2020-10-12
Supplement: Supplementary file 1 [file 600402abbded1ca246206da7.xlsx]

## Sheet: Sheet1
Genome features	Length/bp	A/%	T/%	G/%	C/%	GC content/%
Total	160903	31.73	32.53	17.53	18.21	35.74
LSC	89220	32.58	34.09	16.18	17.15	33.33
SSC	20079	35.91	35.59	13.67	14.83	28.5
IRA	25802	28.58	28.7	22.13	20.59	42.72
IRB	25802	28.7	28.58	20.59	22.13	42.72
